# Supplementary material for: Collectively stabilizing and orienting posterior migratory forces disperses cell clusters in vivo
Source: PubMed Central journal article supplement (PMC7479147; doi:10.1038/s41467-020-18185-2), 2020-09-08
Supplement: 41467_2020_18185_MOESM1_ESM.pdf [file 41467_2020_18185_MOESM1_ESM.pdf]

## Supplementary Information

Collectively stabilizing and orienting posterior migratory forces disperses cell clusters *in vivo*

Lin et al.



Fig. S1- Tail phenotypes during PGC dispersal

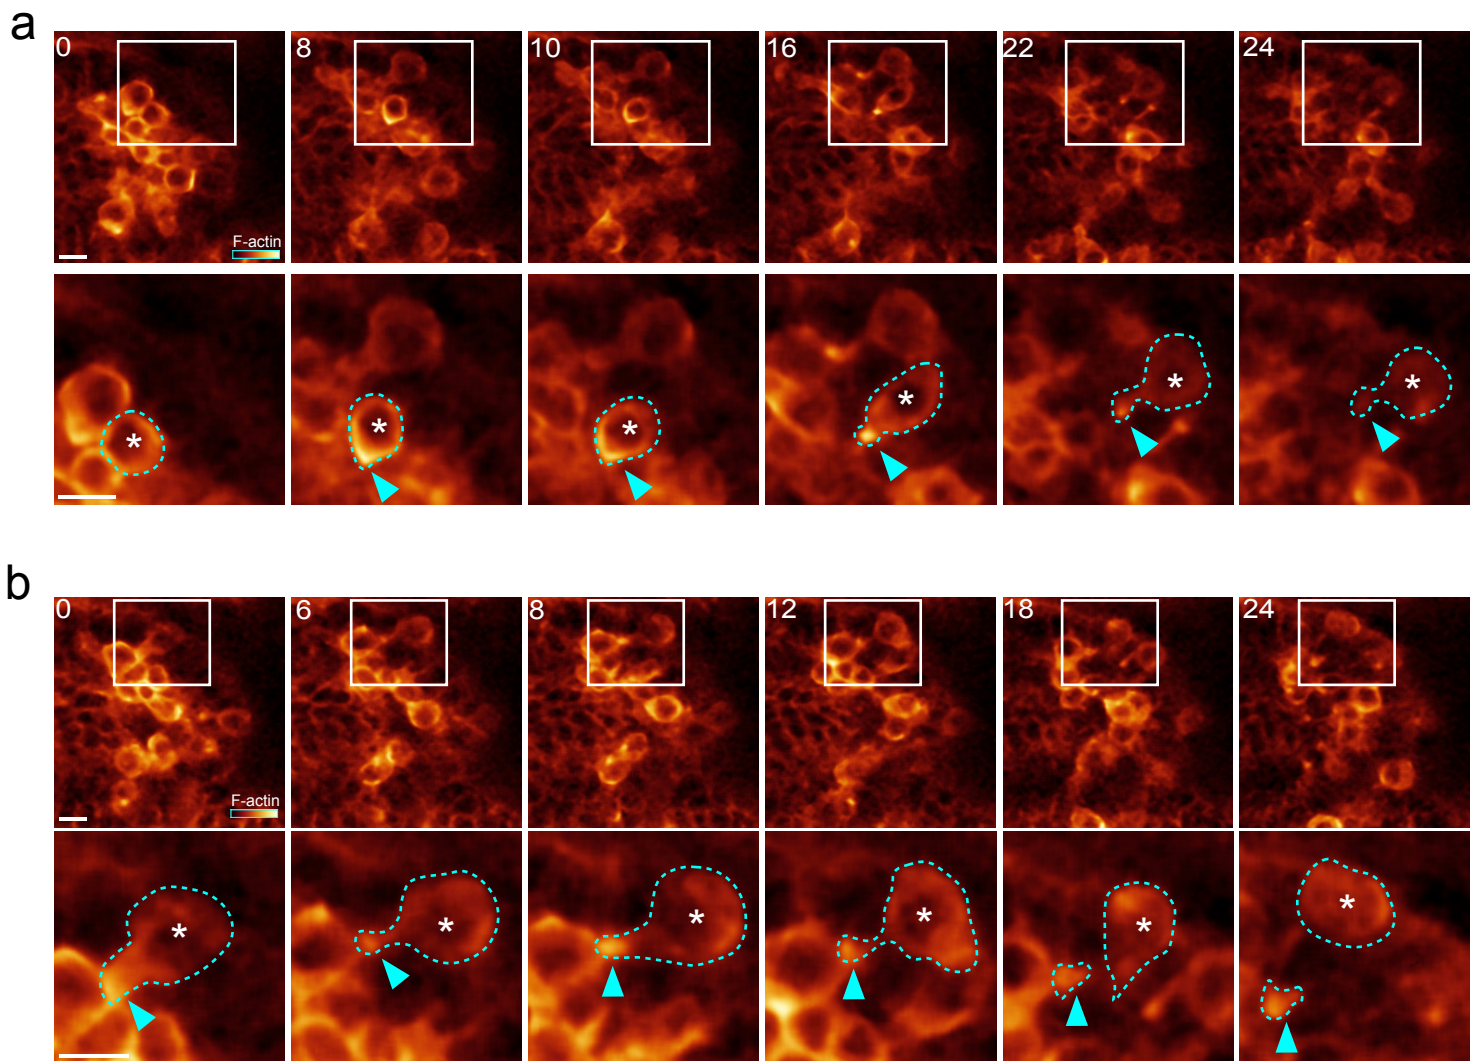

**a-b**, Two photon timelapse imaging of different Z slices from the WT PGC cluster shown in Figure 1 during dispersal, highlighting F-actin foci at PGC tails which are retained (**a**) or detached (**b**). F-actin is visualized with lifect-tdTomato, which is pseudocolored with the indicated color bar in the first image (Intensity ranges- 662 - 13000 (**a**), 680 to 11000 (**b**)). The white rectangle indicates the subregion expanded in the bottom row. Cyan dashed lines outline PGCs, white asterisks track PGCs, and cyan arrows mark PGC tails. Representative images are from  $n = 6$  embryos. Times indicated are in minutes. Scale bars,  $10 \mu\text{m}$ .

Fig. S2- Characterization of the Anillin RhoA-GTP binding domain

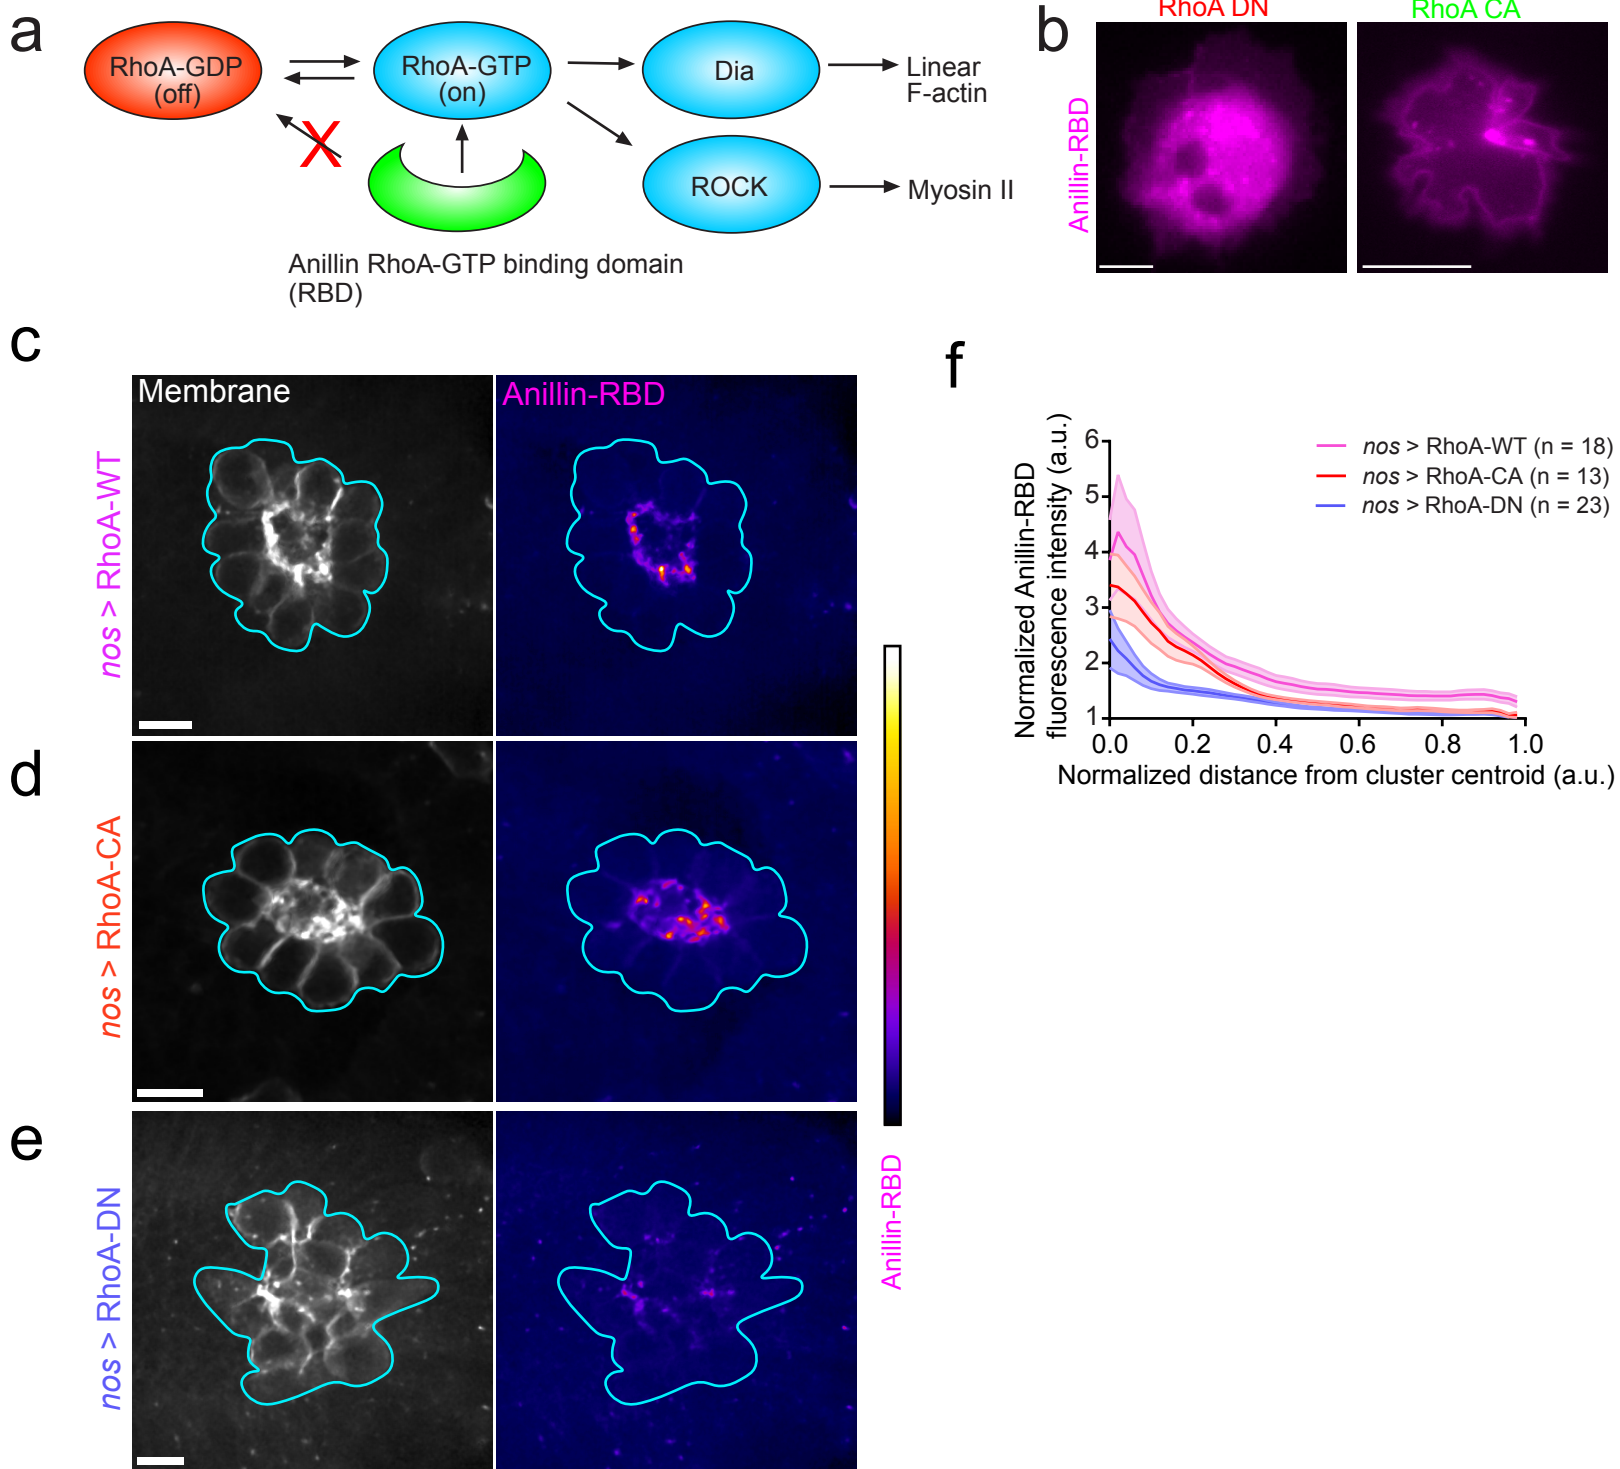

**a**, Schematic depicting simplified RhoA pathway and how the RhoA-GTP binding domain (RBD) of Anillin selectively interacts with GTP bound (active) RhoA. **b**, Anillin-RBD-tdTomato localization in S2 cells transfected with RhoA G14V (Constitutively active (CA)) and RhoA T19N (Dominant negative (DN)). The Anillin-RBD is cytoplasmic when RhoA DN is co-expressed, while it is enriched along the membrane when RhoA CA is co-expressed. Representative image is from n = 2 independent transfections. **c-e**, Two photon imaging of individual Z slices from the center of Anillin-RBD expressing PGC clusters which overexpress (**c**) RhoA-WT, (**d**) RhoA-Constitutively Active (CA), or (**e**) RhoA-Dominant Negative (DN). A membrane marker is also expressed (tdKatushka2-CAAX). The Anillin-RBD is pseudocolored with the color bar on the right (Intensity range- 73 to 1000 in **c-e**). Representative images are from n = 18 embryos in **c**, n = 13 embryos in **d**, and n = 23 embryos in **e**. **f**, Quantification of normalized Anillin-RBD intensity relative to distance from the cluster centroid from PGC clusters overexpressing the indicated RhoA constructs. Number of clusters are indicated. Shaded regions represent SEM. All scale bars, 10  $\mu$ m.

# Fig. S3- Rac1 and Cdc42 binding domains are not polarized in PGC clusters

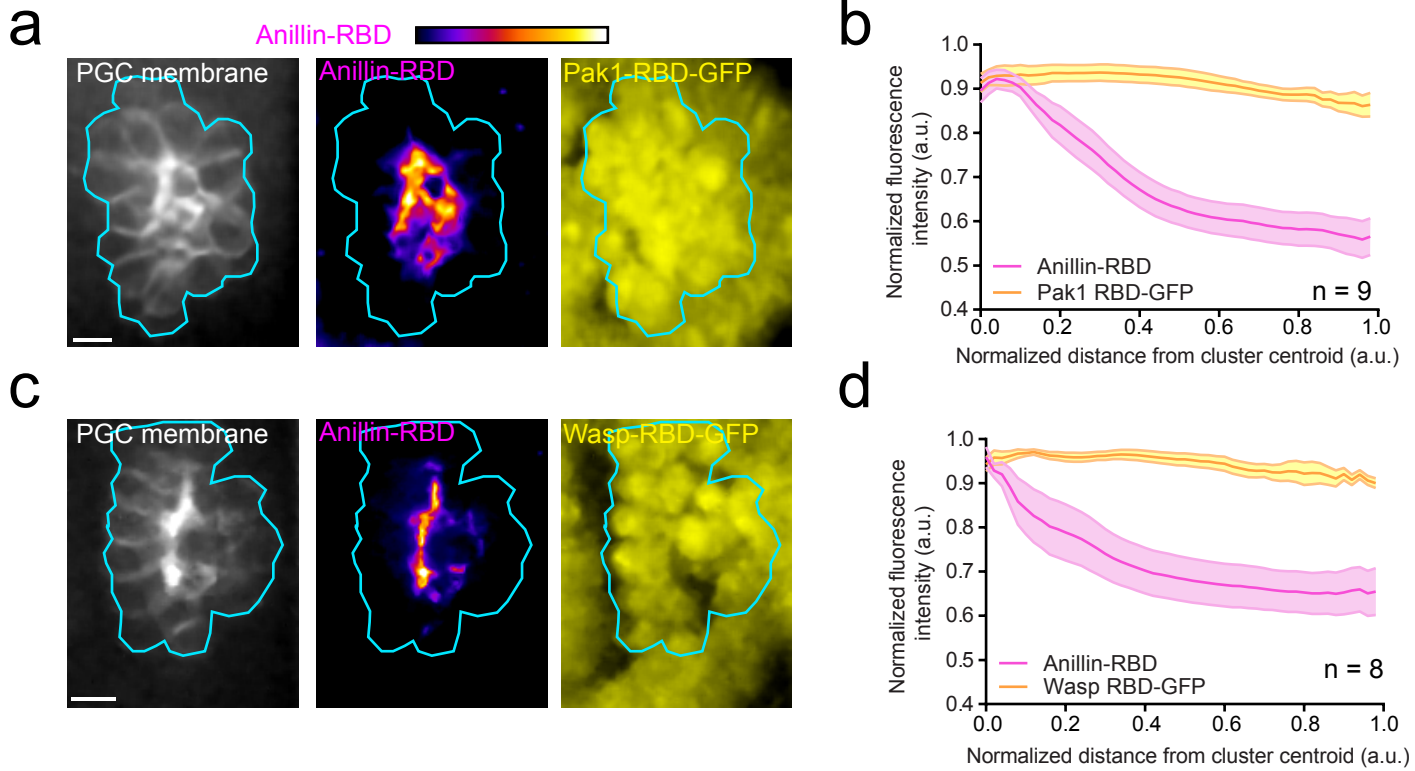

**a**, Two photon imaging of a representative WT PGC cluster expressing the Anillin-RBD, Pak1-Rho binding domain (RBD)-GFP, and membrane marker (tdKatushka2-CAAX). A single Z slice is shown. Anillin-RBD is pseudocolored with color bar above (Intensity range- 1689 - 3771). Representative images are from n = 9 embryos. **b**, Quantification of normalized fluorescence intensity of the Anillin-RBD and Pak1-RBD-GFP in PGC clusters relative to the distance from the cluster centroid. Number of embryos are indicated. Shaded regions are SEM. **c**, Two photon imaging of a representative WT PGC cluster expressing the Anillin-RBD, Wasp-RBD-GFP, and membrane marker (tdKatushka2-CAAX). A single Z slice is shown. Anillin-RBD is pseudocolored with color bar above **a** (Intensity range- 1108 - 3508). Representative images are from n = 8 embryos. **d**, Quantification of normalized fluorescence intensity of the Anillin-RBD and Wasp-RBD-GFP in PGC clusters relative to the distance from the cluster centroid. Number of embryos are indicated. Shaded regions are SEM. All scale bars, 10  $\mu$ m.



Figure S4. Myosin II dynamics in WT and *tre1* PGC clusters

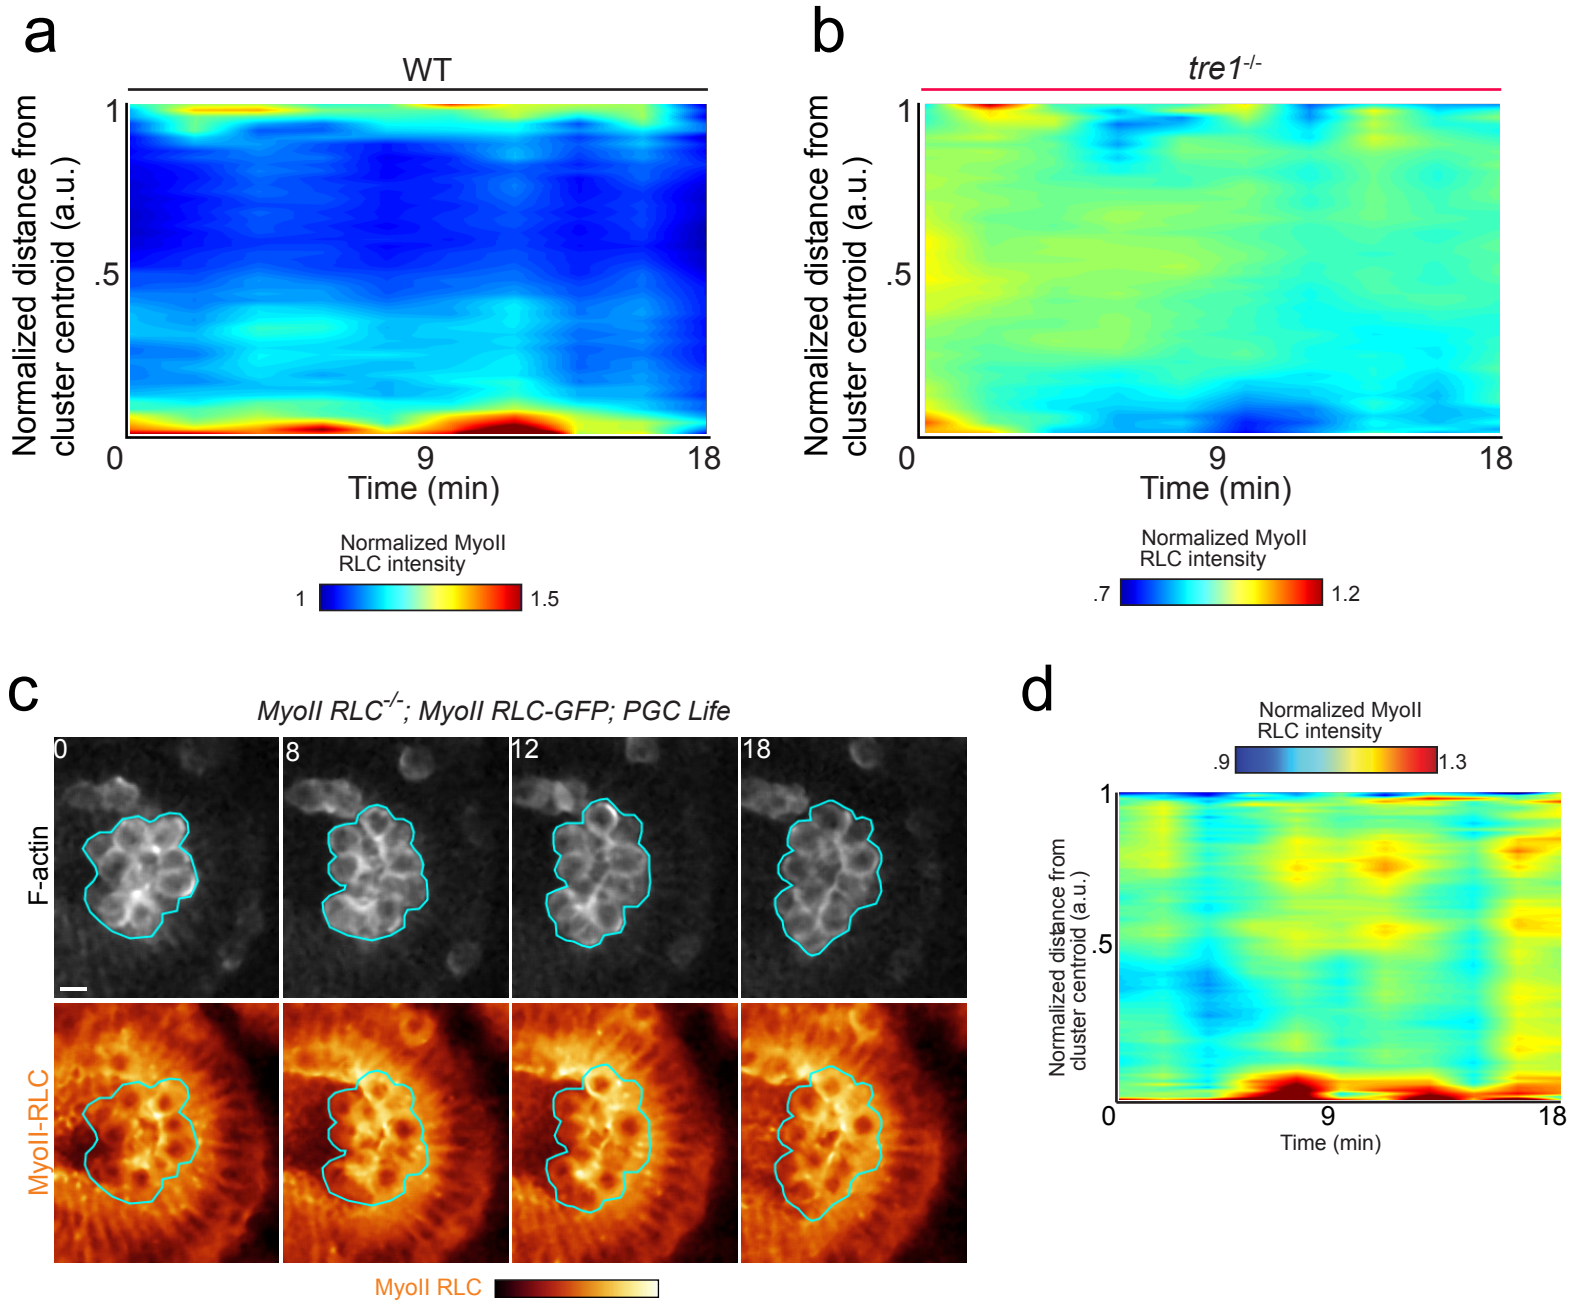

**a-b**, Quantification of normalized Myosin II RLC-GFP intensity vs. distance from the cluster centroid over time. These are the individual myosin II heatmaps from the WT (**a**) or *tre1*<sup>-/-</sup> (**b**) PGC clusters shown in Fig. 3e (**a**) and Fig. 3f (**b**). Myosin II RLC-GFP is pseudocolored with the indicated color bar on bottom. Note that the scaling is different between **a** and **b** to visualize dynamics. The enrichment near the cluster center in **a** is not present in **b**. **c**, Two photon timelapse imaging of a representative WT PGC cluster for 18 minutes prior to endoderm EMT with the indicated genotype on top. All myoII RLC provided to the organism is GFP tagged. A single Z slice is shown over time. Myosin II RLC-GFP is pseudocolored with color bar on bottom (Intensity range- 4000 - 11000). Representative images are from n = 5 embryos. Times are in minutes. Scale bars, 10  $\mu$ m. **d**, Quantification of normalized Myosin II RLC-GFP intensity vs. distance from the cluster centroid over time from the cluster in **c**. The heatmap is interpolated. Myosin II RLC-GFP is pseudocolored with the indicated color bar on top.

# Fig. S5- Optimization of 3'UTR for conditional overexpression in PGCs

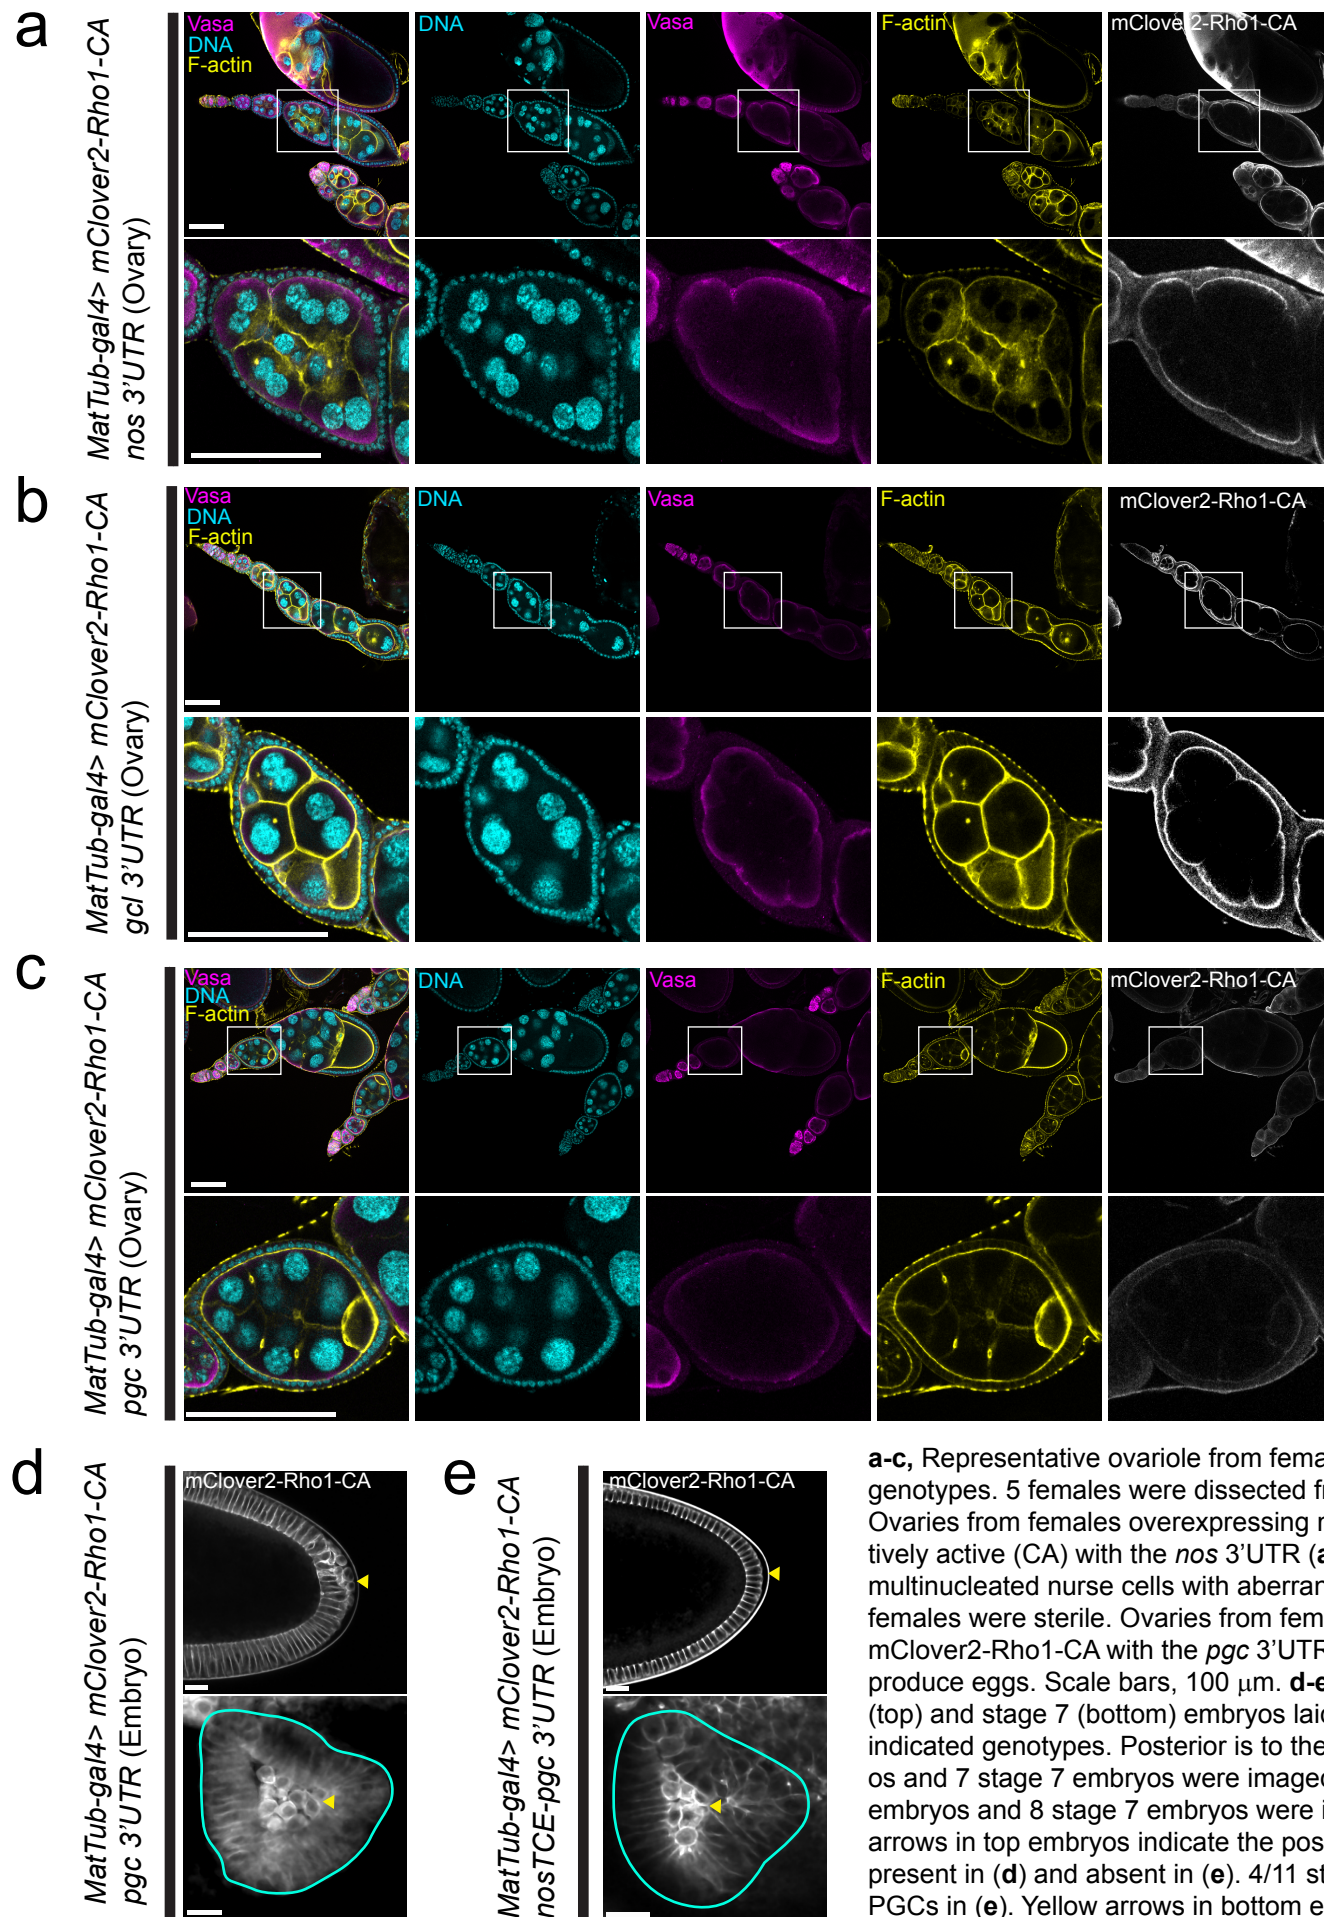

**a-c**, Representative ovariole from females of the indicated genotypes. 5 females were dissected from each genotype. Ovaries from females overexpressing mClover2-Rho1-constitutively active (CA) with the *nos* 3'UTR (**a**) or *gcl* 3'UTR (**b**) had multinucleated nurse cells with aberrant morphology. These females were sterile. Ovaries from females overexpressing mClover2-Rho1-CA with the *pgc* 3'UTR were normal and could produce eggs. Scale bars, 100  $\mu$ m. **d-e**, Representative stage 5 (top) and stage 7 (bottom) embryos laid by females of the indicated genotypes. Posterior is to the right. 11 stage 5 embryos and 7 stage 7 embryos were imaged for (**d**), while 11 stage 5 embryos and 8 stage 7 embryos were imaged for (**e**). Yellow arrows in top embryos indicate the posterior where PGCs are present in (**d**) and absent in (**e**). 4/11 stage 5 embryos had no PGCs in (**e**). Yellow arrows in bottom embryos indicate PGCs. Cyan highlights the endoderm. Note that the transgene is more enriched in PGCs relative to the endoderm in (**e**). Scale bars, 20  $\mu$ m.



**Fig. S6- E-cadherin remains present on PGC membranes before and after endoderm EMT**

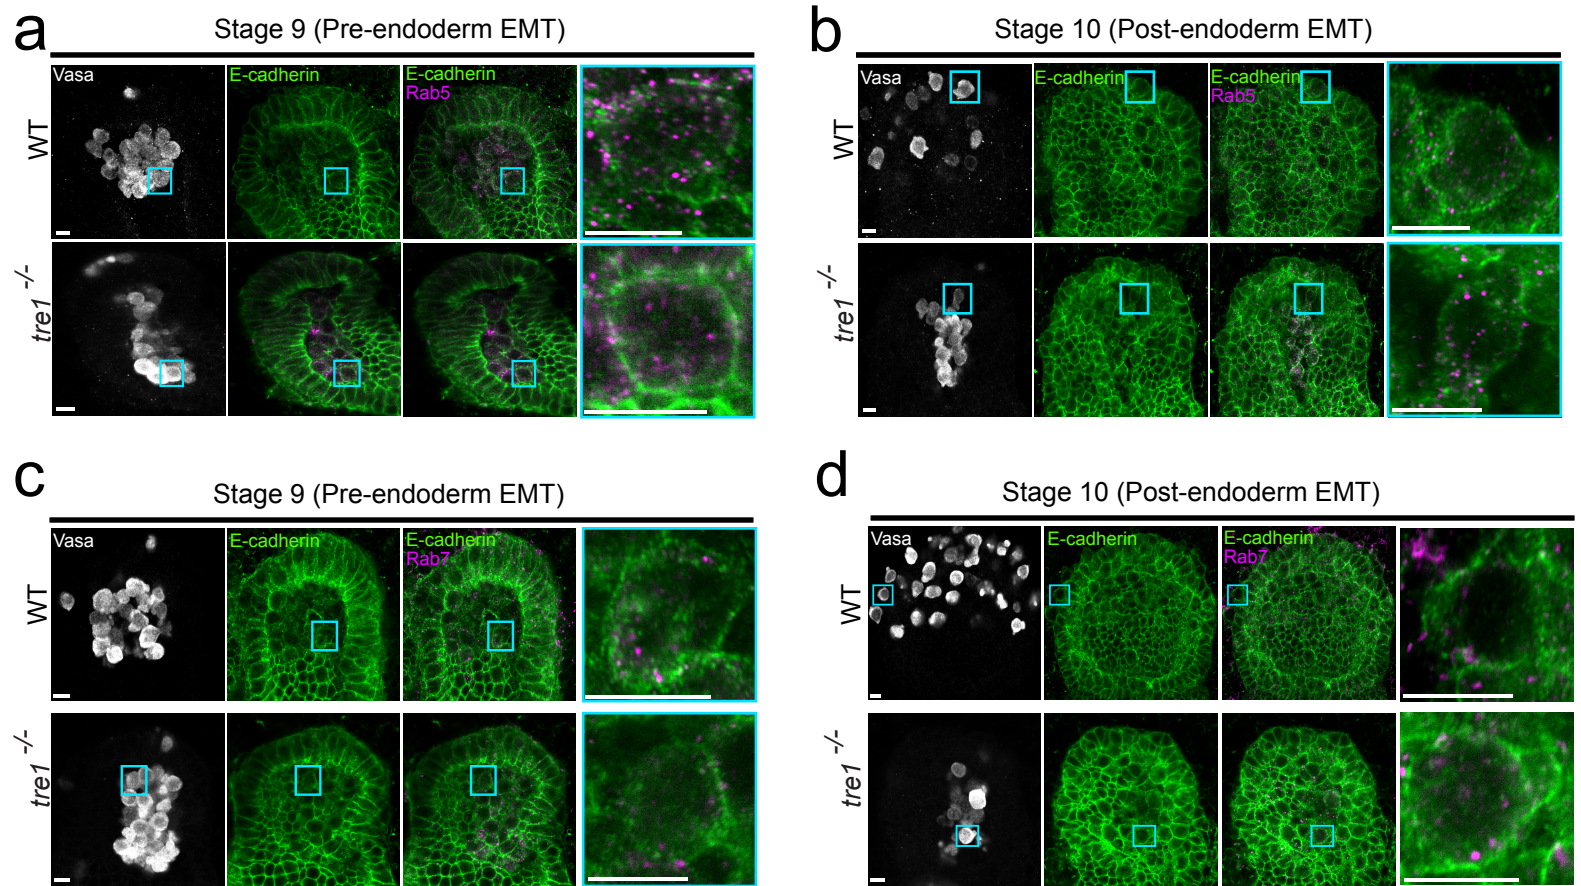

**a-b**, Confocal imaging of a single Z slice from representative WT and *tre1*<sup>-/-</sup> embryos stained prior to endoderm EMT (**a**, stage 9) and after endoderm EMT (**b**, stage 10) for Vasa, Ecadherin, and Rab5. Representative images are from n= 7 WT and n = 4 *tre1*<sup>-/-</sup> embryos in **a** and n = 4 WT and n = 6 *tre1*<sup>-/-</sup> embryos in **b**. **c-d**, Confocal imaging of a single Z slice from representative WT and *tre1*<sup>-/-</sup> embryos stained prior to endoderm EMT (**c**, stage 9) and after endoderm EMT (**d**, stage 10) for Vasa, Ecadherin, and Rab7. Representative images are from n= 7 WT and n = 8 *tre1*<sup>-/-</sup> embryos in **c** and n = 9 WT and n = 5 *tre1*<sup>-/-</sup> embryos in **d**. Scale bars, 10  $\mu$ m.

| <b>Supplementary Table 1</b> |                                                                                                                                                                                                                                                                                                             |                                                                                                                                                                                                              |
|------------------------------|-------------------------------------------------------------------------------------------------------------------------------------------------------------------------------------------------------------------------------------------------------------------------------------------------------------|--------------------------------------------------------------------------------------------------------------------------------------------------------------------------------------------------------------|
| <b>Figure</b>                | <b>Genotype</b>                                                                                                                                                                                                                                                                                             | <b>Source</b>                                                                                                                                                                                                |
| 1A, C                        | nos-Lifeact-tdTomato-P2A-tdKatushka2-CAAX                                                                                                                                                                                                                                                                   | <b>This study</b>                                                                                                                                                                                            |
| 1B                           | tre1 <sup>epΔ5</sup> ; nos-Lifeact-tdTomato-P2A-tdKatushka2-CAAX                                                                                                                                                                                                                                            |                                                                                                                                                                                                              |
| 1D, F-H                      | Matα-gal4::vp16 (67)/UASp(FRT.His2B-GFP)His2B-mKO;<br>nos-Lifeact-tdTomato-p2a-tdKatushka2-CAAX                                                                                                                                                                                                             | Matα-gal4::vp16 (67)- <b>BL7062</b><br>UASp(FRT.His2B-GFP)His2B-mKO- <b>Xin Chen<sup>1</sup></b>                                                                                                             |
| 1E, F-H                      | tre1 <sup>epΔ5</sup> ; Matα-gal4::vp16 (67)/UASp(FRT.His2B-GFP)His2B-mKO; nos-Lifeact-tdTomato-p2a-tdKatushka2-CAAX                                                                                                                                                                                         |                                                                                                                                                                                                              |
| 2A,C                         | nos-tdTomato-Anillin-RBD-P2A-tdKatushka2-CAAX/+                                                                                                                                                                                                                                                             | nos-tdTomato-Anillin-RBD-P2A-tdKatushka2-CAAX <sup>2</sup>                                                                                                                                                   |
| 2B,C                         | tre1 <sup>epΔ5</sup> ; nos-tdTomato-Anillin-RBD-P2A-tdKatushka2-CAAX/+                                                                                                                                                                                                                                      |                                                                                                                                                                                                              |
| 2D,E                         | Matα-gal4::vp16 (67)/P{UASp-dia.RBD-GFP}; nos-tdTomato-Anillin-RBD-P2A-tdKatushka2-CAAX/+                                                                                                                                                                                                                   | P{UASp-dia.RBD-GFP}- <b>BL52291</b>                                                                                                                                                                          |
| 2F,G,I                       | nos-tdTomato-Anillin-RBD-P2A-tdKatushka2-CAAX/P{sqh-GFP-Rok}30                                                                                                                                                                                                                                              | P{sqh-GFP-Rok}30- <b>BL52289</b>                                                                                                                                                                             |
| 2H,I                         | tre1 <sup>epΔ5</sup> ; nos-tdTomato-Anillin-RBD-P2A-tdKatushka2-CAAX/P{sqh-GFP-Rok}30                                                                                                                                                                                                                       |                                                                                                                                                                                                              |
| 3A, C-D                      | nos-tdTomato-Anillin-RBD-P2A-tdKatushka2-CAAX/+;<br>P{sqh-GFP.RLC}3/+                                                                                                                                                                                                                                       | P{sqh-GFP.RLC}3- <b>BL57145</b>                                                                                                                                                                              |
| 3B, C-D                      | tre1 <sup>epΔ5</sup> ; nos-tdTomato-Anillin-RBD-P2A-tdKatushka2-CAAX/+; P{sqh-GFP.RLC}3/+                                                                                                                                                                                                                   |                                                                                                                                                                                                              |
| 3E, H                        | nos-Lifeact-tdTomato-P2A-tdKatushka2-CAAX;<br>P{sqh-GFP.RLC}3                                                                                                                                                                                                                                               |                                                                                                                                                                                                              |
| 3F, H                        | tre1 <sup>epΔ5</sup> ; nos-Lifeact-tdTomato-P2A-tdKatushka2-CAAX; P{sqh-GFP.RLC}3                                                                                                                                                                                                                           |                                                                                                                                                                                                              |
| 3I-J                         | nos-Lifeact-tdTomato-P2A-tdKatushka2-CAAX; MyoII::3XGFP                                                                                                                                                                                                                                                     | MyoII::3xGFP- <b>Yohanns Bellaïche<sup>3</sup></b>                                                                                                                                                           |
| 4B, D-I                      | <b>Donor</b> - nos-Lifeact-tdTomato-P2A-tdKatushka2-CAAX; MyoII::3XGFP<br><b>Host</b> - Tud <sup>A36-38</sup> /Tud <sup>1</sup> ; nos-Lifeact-tdTomato-P2A-tdKatushka2-CAAX/+                                                                                                                               | Tud <sup>A36-38</sup> , Tud <sup>1</sup> - <b>Ruth Lehmann</b>                                                                                                                                               |
| 4C, D-I                      | <b>Donor</b> - tre1 <sup>epΔ5</sup> ; nos-Lifeact-tdTomato-P2A-tdKatushka2-CAAX; MyoII::3XGFP<br><b>Host</b> - Tud <sup>A36-38</sup> /Tud <sup>1</sup> ; nos-Lifeact-tdTomato-P2A-tdKatushka2-CAAX/+                                                                                                        |                                                                                                                                                                                                              |
| 5A,C-E                       | y <sup>1</sup> w <sup>*</sup> cv <sup>1</sup> sqh <sup>AX3</sup> ; P{w[+mC]=sqh-GFP.RLC}2;<br>UASp-degradFP- nos TCE- <i>pgc</i> -3'UTR, nos-Lifeact-tdTomato-P2A-tdKatushka2-CAAX/+ (female)<br>X<br>P{nullo-GAL4.G}5.20, P{w[+mC]=UAS-sqh.WT}TM1 (male)                                                   | y1 w* cv1 sqhAX3; P{w[+mC]=sqh-GFP.RLC}2- <b>BL57144</b><br>UASp-degradFP-nos TCE- <i>pgc</i> 3'UTR- <b>This study</b><br>P{nullo-GAL4.G}5.20- <b>BL26875</b><br>P{w[+mC]=UAS-sqh.WT}TM1- <b>DGRC 109808</b> |
| 5B,C-E                       | y <sup>1</sup> w <sup>*</sup> cv <sup>1</sup> sqh <sup>AX3</sup> ; P{w[+mC]=sqh-GFP.RLC}2;<br>UASp-degradFP- nos TCE- <i>pgc</i> 3'UTR, nos-Lifeact-tdTomato-P2A-tdKatushka2-CAAX/<br>P{w[+mC]=matalpha4-GAL-VP16}V37, P{sqh-GFP.RLC}3 (female)<br>X<br>P{nullo-GAL4.G}5.20, P{w[+mC]=UAS-sqh.WT}TM1 (male) | P{w[+mC]=matalpha4-GAL-VP16}V37- <b>BL7063</b>                                                                                                                                                               |
| 5F-G                         | P{GAL4::VP16-nos.UTR}CG6325 <sup>MVD1</sup> (female) (Experiment)<br>X<br>w[*]; P{w+, UASp-CIBN::pmGFP}; P{w+, UASp-RhoGEF2-CRY2::mCherry} (male)                                                                                                                                                           | P{GAL4::VP16-nos.UTR}CG6325 <sup>MVD1</sup> - <b>BL4937</b><br>P{w+, UASp-CIBN::pmGFP}, P{w+, UASp-RhoGEF2-CRY2::mCherry}<br>- <b>Stefano De Renzis<sup>4</sup></b>                                          |
| 5F-G                         | P{GAL4::VP16-nos.UTR}CG6325 <sup>MVD1</sup> (female) (Control)<br>X<br>w[*]; P{w+, UASp-CIBN::pmGFP} (male)                                                                                                                                                                                                 |                                                                                                                                                                                                              |
| 6A, C                        | <b>Donor</b> - Ecad::3xGFP; nos-Lifeact-tdTomato-P2A-tdKatushka2-CAAX<br><b>Host</b> - nos-Lifeact-tdTomato-P2A-tdKatushka2-CAAX                                                                                                                                                                            | Ecad::3xGFP- <b>Yohanns Bellaïche<sup>3</sup></b>                                                                                                                                                            |
| 6B, C                        | <b>Donor</b> - tre1 <sup>epΔ5</sup> ; Ecad::3xGFP; nos-Lifeact-tdTomato-P2A-tdKatushka2-CAAX<br><b>Host</b> - tre1 <sup>epΔ5</sup> ; nos-Lifeact-tdTomato-P2A-tdKatushka2-CAAX                                                                                                                              |                                                                                                                                                                                                              |
| 6D, F                        | <b>Control</b> - Matα-gal4::vp16 (67)/+; nos-Lifeact-tdTomato-P2A-tdKatushka2-CAAX/+<br><b>Ecadherin-OE</b> - Matα-gal4::vp16 (67)/UASp-DE-cadherin-mClover2-nos TCE- <i>pgc</i> 3'UTR; nos-Lifeact-tdTomato-P2A-tdKatushka2-CAAX/+                                                                         | UASp-DE-cadherin-mClover2-nos TCE- <i>pgc</i> 3'UTR- <b>This study</b>                                                                                                                                       |
| 6E, G                        | <b>Control</b> - MatTub-gal4/+; nos-Lifeact-tdTomato-P2A-tdKatushka2-CAAX/+<br><b>Neuroglian-OE</b> - MatTub-gal4/UASp-Neuroglian-mClover2-nos TCE- <i>pgc</i> 3'UTR; nos-Lifeact-tdTomato-P2A-tdKatushka2-CAAX/+                                                                                           | MatTub-gal4- <b>This study</b><br>UASp-Neuroglian-mClover2-nos TCE- <i>pgc</i> 3'UTR- <b>This study</b>                                                                                                      |
| 6H, J                        | <b>Control</b> - tre1 <sup>epΔ5</sup> ; Matα-gal4::vp16 (67)/+; nos-Lifeact-tdTomato-P2A-tdKatushka2-CAAX/+<br><b>Ecadherin-OE</b> - tre1 <sup>epΔ5</sup> ; Matα-gal4::vp16 (67)/UASp-DE-cadherin-mClover2-nos TCE- <i>pgc</i> 3'UTR; nos-Lifeact-tdTomato-P2A-tdKatushka2-CAAX/+                           |                                                                                                                                                                                                              |
| 6I, J                        | <b>Control</b> - tre1 <sup>epΔ5</sup> ; MatTub-gal4/+; nos-Lifeact-tdTomato-P2A-tdKatushka2-CAAX/+<br><b>Neuroglian-OE</b> - tre1 <sup>epΔ5</sup> ; MatTub-gal4/UASp-Neuroglian-mClover2-nos TCE- <i>pgc</i> 3'UTR; nos-Lifeact-tdTomato-P2A-tdKatushka2-CAAX/+                                             |                                                                                                                                                                                                              |
| 7A,C, E-G                    | Donor- nos-Lifeact-tdTomato-P2A-tdKatushka2-CAAX<br>Host- tre1 <sup>epΔ5</sup> ; nos-EGFP::moe; nos-EGFP::moe                                                                                                                                                                                               | nos-EGFP::moe- <b>Ruth Lehmann</b>                                                                                                                                                                           |

|            |                                                                                                                                                                                                                  |                                                                      |
|------------|------------------------------------------------------------------------------------------------------------------------------------------------------------------------------------------------------------------|----------------------------------------------------------------------|
| 7B,D, E-G  | Donor- nos-Lifeact-tdTomato-P2A-tdKatushka2-CAAX<br>Host- nos-EGFP::moe                                                                                                                                          |                                                                      |
| Fig. S1A,B | nos-Lifeact-tdTomato-P2A-tdKatushka2-CAAX                                                                                                                                                                        |                                                                      |
| Fig. S2C,F | nos-tdTomato-Anillin-RBD-P2A-tdKatushka2-CAAX/+; P{GAL4::VP16-nos.UTR}CG6325MVD1 (Female)<br>X<br>w[*]; P{w[+mC]=UAS-Rho1.W}3                                                                                    | P{w[+mC]=UAS-Rho1.W}3- <b>BL28872</b>                                |
| Fig. S2D,F | nos-tdTomato-Anillin-RBD-P2A-tdKatushka2-CAAX/+; P{GAL4::VP16-nos.UTR}CG6325MVD1 (Female)<br>X<br>w[*]; P{w[+mC]=UAS-Rho1.V14}2.1 (male)                                                                         | P{w[+mC]=UAS-Rho1.V14}2.1- <b>BL8144</b>                             |
| Fig. S2E,F | nos-tdTomato-Anillin-RBD-P2A-tdKatushka2-CAAX/+; P{GAL4::VP16-nos.UTR}CG6325MVD1 (Female)<br>X<br>w[*]; P{w[+mC]=UAS-Rho1.N19}2.1 (male)                                                                         | P{w[+mC]=UAS-Rho1.N19}2.1- <b>BL7328</b>                             |
| Fig. S3A,B | P{w[+mC]=sqh-Pak1.RBD-GFP}21/+;<br>nos-tdTomato-Anillin-RBD-P2A-tdKatushka2-CAAX/+                                                                                                                               | P{w[+mC]=sqh-Pak1.RBD-GFP}21- <b>BL56549</b>                         |
| Fig. S3C,D | P{sqh-WASp.RBD-GFP}378a P{sqh-WASp.RBD-GFP}378b/<br>nos-tdTomato-Anillin-RBD-P2A-tdKatushka2-CAAX                                                                                                                | P{sqh-WASp.RBD-GFP}378a,<br>P{sqh-WASp.RBD-GFP}378b - <b>BL56746</b> |
| Fig. S4A   | nos-Lifeact-tdTomato-P2A-tdKatushka2-CAAX;<br>P{sqh-GFP.RLC}3                                                                                                                                                    |                                                                      |
| Fig. S4B   | tre1 <sup>epΔ5</sup> ; nos-Lifeact-tdTomato-P2A-tdKatushka2-CAAX; P{sqh-GFP.RLC}3                                                                                                                                |                                                                      |
| Fig. S4C,D | y1 w* cv1 sqhAX3; P{w[+mC]=sqh-GFP.RLC}2; nos-Lifeact-tdTomato-P2A-tdKatushka2-CAAX                                                                                                                              |                                                                      |
| Fig. S5A   | MatTub-gal4/UASp-mClover2-Rho1-G14V-nos 3'UTR                                                                                                                                                                    | UASp-mClover2-Rho1-G14V-nos 3'UTR- <b>This study</b>                 |
| Fig. S5B   | MatTub-gal4/UASp-mClover2-Rho1-G14V-gcl 3'UTR                                                                                                                                                                    | UASp-mClover2-Rho1-G14V-gcl 3'UTR- <b>This study</b>                 |
| Fig. S5C,D | MatTub-gal4/UASp-mClover2-Rho1-G14V-pgc 3'UTR                                                                                                                                                                    | UASp-mClover2-Rho1-G14V-pgc 3'UTR- <b>This study</b>                 |
| Fig. S5E   | MatTub-gal4/UASp-mClover2-Rho1-G14V-nos TCE-pgc 3'UTR                                                                                                                                                            | UASp-mClover2-Rho1-G14V-nos TCE-pgc 3'UTR- <b>This study</b>         |
| Fig. S6    | WT- Ecad::3xGFP<br>tre1 <sup>-/-</sup> - tre1 <sup>epΔ5</sup> ; Ecad::3xGFP                                                                                                                                      |                                                                      |
|            |                                                                                                                                                                                                                  |                                                                      |
|            |                                                                                                                                                                                                                  |                                                                      |
|            |                                                                                                                                                                                                                  |                                                                      |
|            | <b>References</b>                                                                                                                                                                                                |                                                                      |
|            | 1. Tran, V., Lim, C., Xie, J. & Chen, X. Asymmetric division of Drosophila male germline stem cell shows asymmetric histone distribution. <i>Science (New York, N.Y.)</i> <b>338</b> , 679-682 (2012).           |                                                                      |
|            | 2. Kong, D. et al. In vivo optochemical control of cell contractility at single cell resolution. <i>EMBO Reports</i> , EMBR1310                                                                                  |                                                                      |
|            | 3. Pinheiro, D. et al. Transmission of cytokinesis forces via E-cadherin dilution and actomyosin flows. <i>Nature</i> <b>545</b> , 103 (2017).                                                                   |                                                                      |
|            | 4. Izquierdo, E., Quinkler, T. & De Renzis, S. Guided morphogenesis through optogenetic activation of Rho signalling during early Drosophila embryogenesis. <i>Nature Communications</i> <b>9</b> , 2366 (2018). |                                                                      |



Supplementary Table 2

| Primer name                        | sequence                                                                                                                                    | Purpose                                                                                 |
|------------------------------------|---------------------------------------------------------------------------------------------------------------------------------------------|-----------------------------------------------------------------------------------------|
| pwal22_loxp_rev                    | CATACATTATACGAAGTTATAAGCTGGTACTACTAGT                                                                                                       | Create pwalium22 infusion template lacking UAS and K10                                  |
| pwal22_k10end_fwd                  | GCGTGCTTTGGAGCTGAG                                                                                                                          | Create pwalium22 infusion template lacking UAS and K10                                  |
| pwal22_nheI_nos5utr_fwd            | TTCGTATAATGTATGgctagcAAGCTTCGACCGTTTTAACCTCG                                                                                                | Clone nos 5'UTR and promoter into pwalium22                                             |
| nos5utr_Zral_nos3utr_rev           | CAGAGCTGGATTGCCCTCTgacgtcGGCGAAAAATCCGGTTCGAAA                                                                                              | Clone nos 5'UTR and promoter into pwalium22                                             |
| nos3utr_fwd                        | AGAGGGCGAATCCAGCTC                                                                                                                          | Clone nos 3'UTR into pwalium22                                                          |
| pwal22_ecori_nos3utr_rev           | AGCTCAAAGCACGCgaattcCCTTAAATTGTAACCATTTCTTTATTGGCACTC                                                                                       | Clone nos 3'UTR into pwalium22                                                          |
| Pwalium22_NheI_rev                 | GCTAGCGGCTGAATATGGGAT                                                                                                                       | Create pwalium22 infusion template with UAS and lacking K10                             |
| pwal22_nheI_gprk2_fwd              | tcccatattcagccgctagcATGGAATTAGAGAATATTGTGCCAATACG                                                                                           | Clone GPRK2 as a spacer into pwalium22 with nos TCE-pgc 3'UTR                           |
| gprk2_zral_nosTCE_pgc3_fwd         | CGACGGTCGAAAGCTGAgacgtcAGAGGGCGAATCCAGCTCTGGAGCAGAGGCTCTGG<br>CAGCTTTTTCGAGCGTTTATATAACATGAAATATATACGCATTCGATCAAAGCTGGGTTctggacctcccaaaagcc | Clone GPRK2 as a spacer into pwalium22 with nos TCE-pgc 3'UTR                           |
| pwal22_ecori_pgc3UTR_rev           | AGCTCAAAGCACGCgaattcACGATTGCGAATCGAAAATATATTTCTATCTATTTTTTG                                                                                 | Clone the pgc 3'UTR into pwalium22                                                      |
| gcl3utr_fwd_224                    | GCACGTGCTGAGCAGTC                                                                                                                           | Clone the gcl 3'UTR into pwalium22                                                      |
| gcl3utr_ecori_pwal22_rev           | CCCTCAGCTCAAAGCACGCgaattcTTATAAGTGAATCTTAAATAAATGCACTCAAGTAATGTTACTG                                                                        | Clone the gcl 3'UTR into pwalium22                                                      |
| nos5_zral_Lifeact_fwd              | CGACCCGGATTTTCGCCgacATGGGTGTGCGGACCTCATCAAGAAGTTCGAGAGTATTCCAAGGAAGAG<br>agtgcaggtggaagtctggaggcagtcaggtggaATGGTGAGCAAGGGCG                 | Clone lifeact-tdtomato-p2a-tdKatushka2-CAAX into pwalium22 with nos regulatory elements |
| tdtomato_nostop_p2a_rev            | ggggccggggttctctcccagctcggcctgcttcagcaggagaagtgggtggcgccCTTGACAGCTCGTCCATGC                                                                 | Clone lifeact-tdtomato-p2a-tdKatushka2-CAAX into pwalium22 with nos regulatory elements |
| p2aoverlap_tdkatushka_fwd          | tggaggagaacccccggccccATGGTGGGTGAGGATAGCG                                                                                                    | Clone lifeact-tdtomato-p2a-tdKatushka2-CAAX into pwalium22 with nos regulatory elements |
| tdKatushka2_caax_stop_zral_nos3utr | agctggattccctctgacTTAcatgatgacacattctgtttgactttctttttttcttccatccttctcatctttctttGCTGTGCCCCAGTTTGC                                            | Clone lifeact-tdtomato-p2a-tdKatushka2-CAAX into pwalium22 with nos regulatory elements |
| pw22_nheI_NSlmb-vhhGFP4_fwd        | tcccatattcagccgctagcATGATGAAAATGGAGACTGACAAAATAATGGA                                                                                        | Clone degradFP system into pwalium22 with nos TCE-pgc 3'UTR                             |
| NSlmb-vhhGFP4_stop_nosTCE_rev      | CAGAGCTGGATTGCCCTCTgacTTAGCTGGAGACGGTGAC                                                                                                    | Clone degradFP system into pwalium22 with nos TCE-pgc 3'UTR                             |
| pw22_nheI_shotgun_fwd              | TTCGTATAATGTATGgctagcATGTCCACCAGTGTCCAGC                                                                                                    | Clone dE-cadherin-mClover2 into pwalium22 with nos TCE-pgc 3'UTR                        |
| shotgun_linker_rev                 | tccacctgactgctccagcacttccacctgactGATGCGCCAGCCCTG                                                                                            | Clone dE-cadherin-mClover2 into pwalium22 with nos TCE-pgc 3'UTR                        |
| linker_mclover2_fwd                | ctggaggcagtcaggtggaATGGTGAGCAAGGGCGA                                                                                                        | Clone dE-cadherin-mClover2 into pwalium22 with nos TCE-pgc 3'UTR                        |
| mClover2_stop_zral_NosTCE_rev      | CAGAGCTGGATTGCCCTCTgacttaCTTGACAGCTCGTCCATGC                                                                                                | Clone dE-cadherin-mClover2 into pwalium22 with nos TCE-pgc 3'UTR                        |
| pw22_nheI_uasp_NRG_fwd             | tcccatattcagccgctagcATGTGGCGGCAAGTCAA                                                                                                       | Clone Neuroglial-mClover2 into pwalium22 with nos TCE-pgc 3'UTR                         |
| NRG_linker_rev                     | tccacctgactgctccagcacttccacctgactAAGTCCTTTGCGTCCATATTGG                                                                                     | Clone Neuroglial-mClover2 into pwalium22 with nos TCE-pgc 3'UTR                         |

|                            |                                                                                                                                                                                                                                                                                                                    |                                                                   |
|----------------------------|--------------------------------------------------------------------------------------------------------------------------------------------------------------------------------------------------------------------------------------------------------------------------------------------------------------------|-------------------------------------------------------------------|
| Rho1G14V_fwd_137           | GTCGGCGACGtcGCCTGCGGTA                                                                                                                                                                                                                                                                                             | site directed mutagenesis for creating Rho1 constitutively active |
| Rho1G14V_rev_138           | AATTACCAATTTCTTGCGAATCGTC                                                                                                                                                                                                                                                                                          | site directed mutagenesis for creating Rho1 constitutively active |
| Rho1T19N_fwd_139           | TGCGGTAAAacTGCCTTCTGATTGTCTTCAGCAAAG                                                                                                                                                                                                                                                                               | site directed mutagenesis for creating Rho1 dominant negative     |
| Rho1T19N_rev_140           | GGCACCGTCGCCGACAAT                                                                                                                                                                                                                                                                                                 | site directed mutagenesis for creating Rho1 dominant negative     |
| pwal22_nheI_mclover2_fwd   | tcccatattcagccgctagcGCCACCATGGTGAGCAAG                                                                                                                                                                                                                                                                             | Clone mClover2-Rho1 constructs                                    |
| mClover2_nostop_linker_rev | tccacctgactgcctccagcactCTGTACAGCTCGTCCATGC                                                                                                                                                                                                                                                                         | Clone mClover2-Rho1 constructs                                    |
| linker_rho1_fwd            | ctggaggcagtcaggtggaATGACGACGATTGCAAGAAATTG                                                                                                                                                                                                                                                                         | Clone mClover2-Rho1 constructs                                    |
| rho1g14v_stop_nos3utr_rev  | cagagctggattccctctTTAGAGCAAAGGCATCTGGTCTTC                                                                                                                                                                                                                                                                         | Clone mClover2-Rho1 G14V with <i>nos</i> 3'UTR                    |
| rho1g14v_stop_pgc3utr_rev  | ttggctttgggaggtccagTTAGAGCAAAGGCATCTGGTCTTC                                                                                                                                                                                                                                                                        | Clone mClover2-Rho1 G14V with <i>pgc</i> 3'UTR                    |
| rho1g14v_stop_gcl3utr_rev  | gtggactgctcagcagctgcTTAGAGCAAAGGCATCTGGTCTTC                                                                                                                                                                                                                                                                       | Clone mClover2-Rho1 G14V with <i>gcl</i> 3'UTR                    |
| pac5_fwd_infus             | AGACATGATAAGATACATTGATGAGTTTG                                                                                                                                                                                                                                                                                      | Create actin promoter infusion template                           |
| pac5_rev_infus             | CCGATCCGGGGTCTCT                                                                                                                                                                                                                                                                                                   | Create actin promoter infusion template                           |
| pAc_mclover2_fwd           | ATCCAGAGACCCCGATCGGGCCACCATGGTGAGCAA                                                                                                                                                                                                                                                                               | Clone mClover2-Rho1 constructs into actin promoter vector         |
| rho1_stop_sv40pa_rev       | CAATGTATCTTATCATGTCTttaGAGCAAAGGCATCTGGTCTTC                                                                                                                                                                                                                                                                       | Clone mClover2-Rho1 constructs into actin promoter vector         |
| pw22_atub67c_prom_fwd      | TTCGTATAATGTATGgctagcTTGACAAATGAAGCTGTTACCTGTATTAGT                                                                                                                                                                                                                                                                | Clone MatTub-Gal4 into pwalium22                                  |
| atub67c_prom_rev           | GCCAATCTGGATGGAGACTACTT                                                                                                                                                                                                                                                                                            | Clone MatTub-Gal4 into pwalium22                                  |
| atub67c_Gal4_fwd           | tagtctccatccagattggcAAGCTGCTGAGTAGTATTGAACAA                                                                                                                                                                                                                                                                       | Clone MatTub-Gal4 into pwalium22                                  |
| Gal4_rev                   | CTACTCCTTCITTTGGGTTCGGT                                                                                                                                                                                                                                                                                            | Clone MatTub-Gal4 into pwalium22                                  |
| gal4_atub84b_pw22 (Gblock) | ACCCAAAGAAGGAGTAGgacGCGTCACGCCACTTCAACGCTCGATGGGAGCGTCATTGGTGGGCGGGGTAACCGTCGAAATCAGTGTT<br>TACGCTTC<br>CAATCGCAACAAAAATCACTGCAACACTGAAAAGCATAAGAAACGATGAAGATTGACGAGAAACCATAAAGTATTTATCCACA<br>AAGACACGTATAGCAGAAAAGCCAAGTTAACTCGGCGATAAAGTTGTGTACACAAGAATAAAATCGGCCAGATTCAAGTGTTCAGAAA<br>TAAGgtcgaattcGCGTCTTTGG | Clone MatTub-Gal4 into pwalium22                                  |
